# Supplementary material
Source: PubMed Central journal article supplement (PMC7238368)
Supplement: Supplemental_Material.pdf [file Supplemental_Material.pdf]

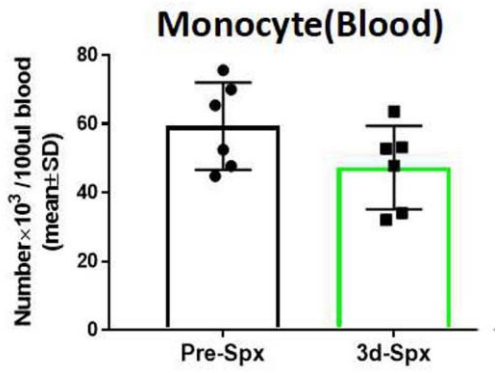

Supplementary figure 1: Blood monocyte count was measured before and after splenectomy using flow cytometry. Splenectomy alone does not induce any significant differences in peripheral monocyte number prior to and 3 days after splenectomy. N=6/group, F value= 1.095, Unpaired T test.

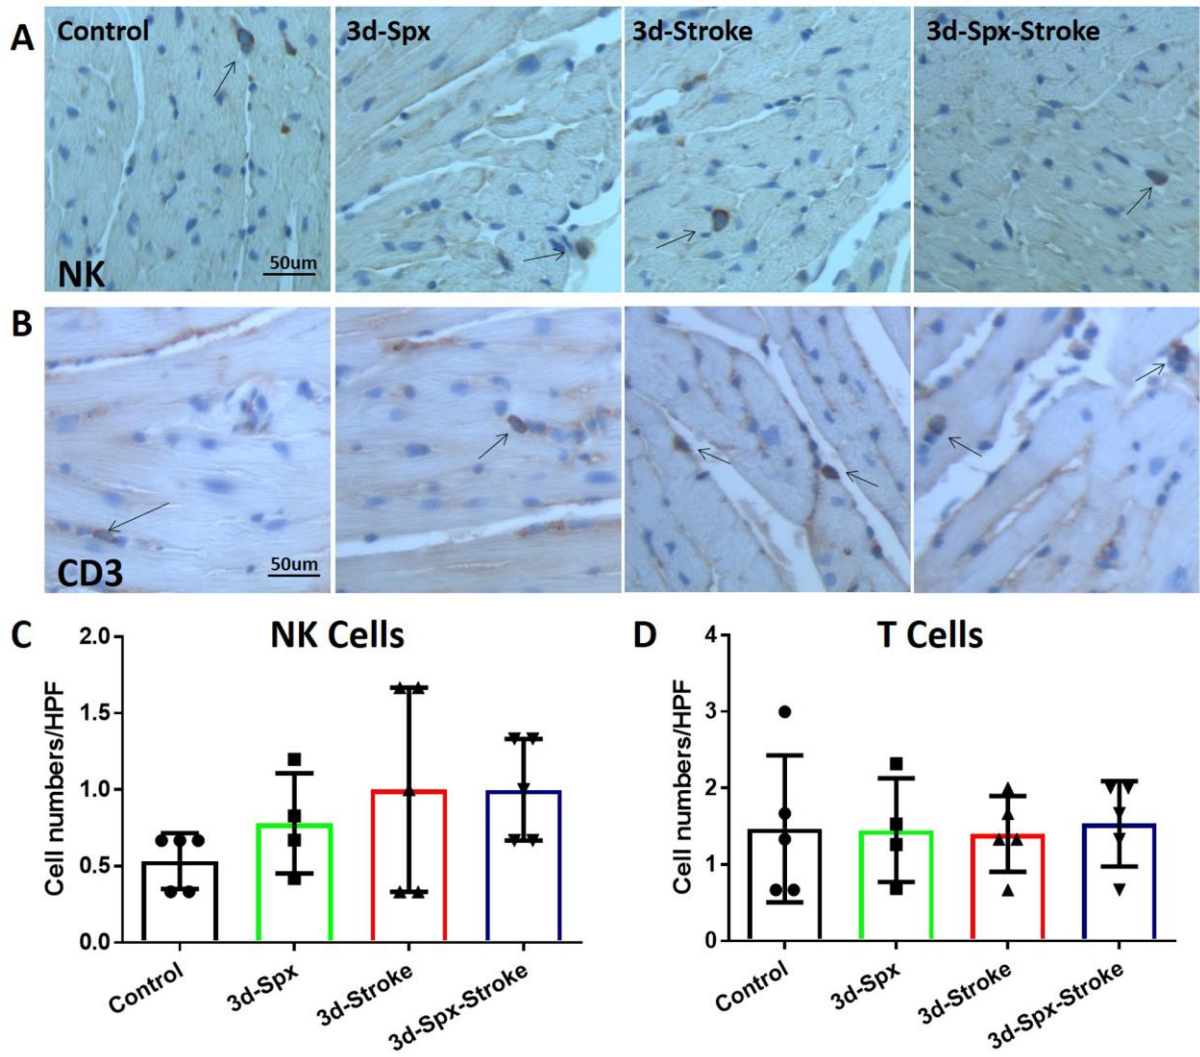

Supplementary figure 2: Stroke does not significantly increase NK and T cell number in the heart compared to sham control mice. (A) Representative images of immunostaining for NK cells. (B) Representative images of immunostaining for NK cells. (C) Immunostaining quantification data of NK cells. F value=1.518. (D) Immunostaining quantification data of T cells. F value=0.067. N=5/group, except 3d-spx n=4/group.

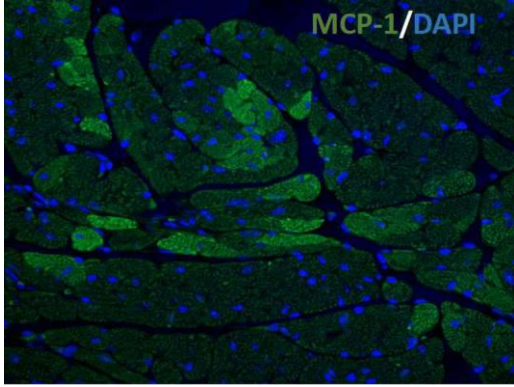

Supplementary figure 3: MCP-1 immunostaining of heart tissue at 1 month after stroke.
